# Supplementary material
Source: publisher site journal article supplement (https://www.dovepress.com/article/179226)
Supplement: Supplementary file 1 [file get_supplementary_file.php]

Enhanced Photo/Chemo Combination Efficiency against Bladder Tumor by Encapsulation of DOX and ZnPC into *in situ*-Formed Thermo-Sensitive Polymer Hydrogel

*Zhongming Huang, He Xiao, Xiangyun Lu, Weigang Yan, Zhigang Ji\**

Correspondence: Zhigang Ji.

Department of Urology, Peking Union Medical College Hospital, Chinese Academy of Medical Sciences and Peking Union Medical College, Beijing 100730, China.

No.1 Shuaifuyuan Wangfujing, Dongcheng, Beijing, 100730, China

TEL: 86-1069152511

Fax: 86-1069152511

Email: zhigangji@163.com

## Supporting Information

### Table of Contents

|                                                                                                                                  |   |
|----------------------------------------------------------------------------------------------------------------------------------|---|
| Figure S1. Chemical structure of tri-block copolymer PCL-PTSUO-PEG .....                                                         | 3 |
| Figure S2. <sup>1</sup> H NMR characterization of tri-block copolymer PCL-PTSUO-PEG.....                                         | 3 |
| Figure S3. The viscosity changes of TNP solution with temperature.....                                                           | 3 |
| Figure S4. Dynamic frequency sweep at the strain of 2% for TNP/DOX/ZnPC <sup>GEL</sup> .....                                     | 4 |
| Figure S5. Dynamic frequency sweep at the strain of 2% for TNP/DOX/ZnPC <sup>GEL</sup> after drug release study for 20 days..... | 4 |
| Figure S6. Dynamic frequency sweep at the strain of 2% for TNP/DOX/ZnPC <sup>GEL</sup> after laser treatment.....                | 5 |
| Figure S7. In vivo 5637 cells xenograft inhibition analysis.....                                                                 | 5 |

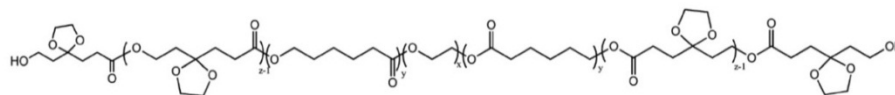

Figure S1. Chemical structure of tri-block copolymer PCL-PTSUO-PEG.

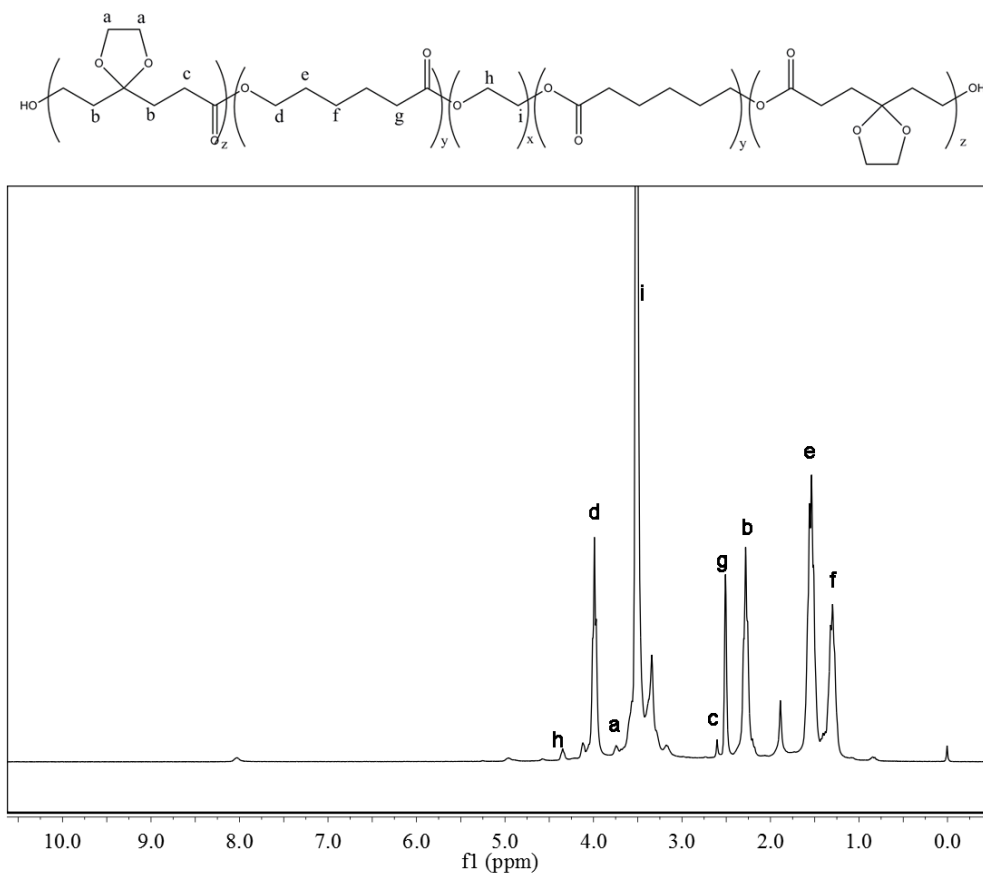

Figure S2.  $^1\text{H}$  NMR characterization of tri-block copolymer PCL-PTSUO-PEG.

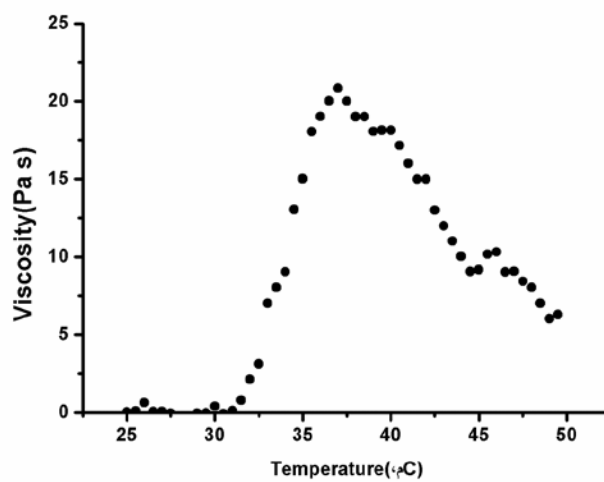

Figure S3. The viscosity changes of TNP solution with temperature at the polymer concentration of 20% (W/W).

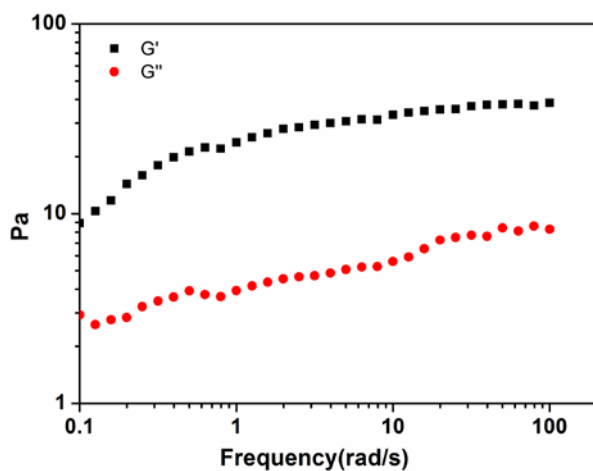

Figure S4. Dynamic frequency sweep at the strain of 2% for TNP/DOX/ZnPC<sup>GEL</sup>.

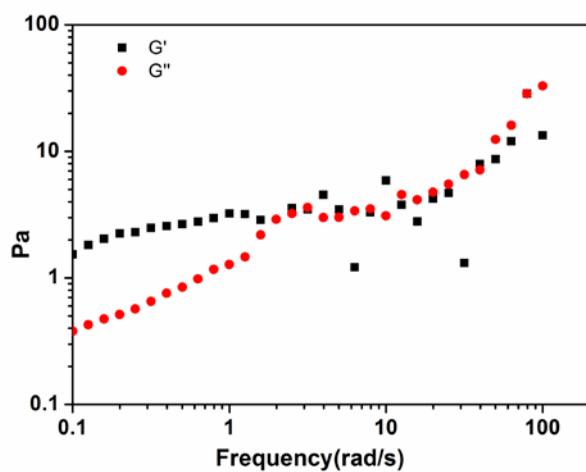

Figure S5. Dynamic frequency sweep at the strain of 2% for TNP/DOX/ZnPC<sup>GEL</sup> after drug release study for 20 days.

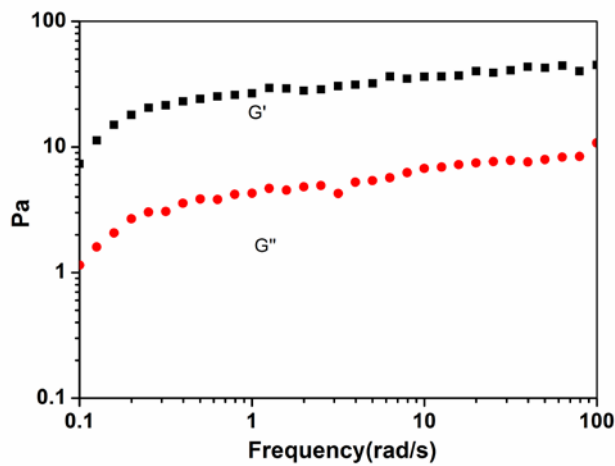

Figure S6. Dynamic frequency sweep at the strain of 2% for TNP/DOX/ZnPC<sup>GEL</sup> after laser treatment (660 nm for 90 sec with intensity of 100 J/cm<sup>2</sup>).

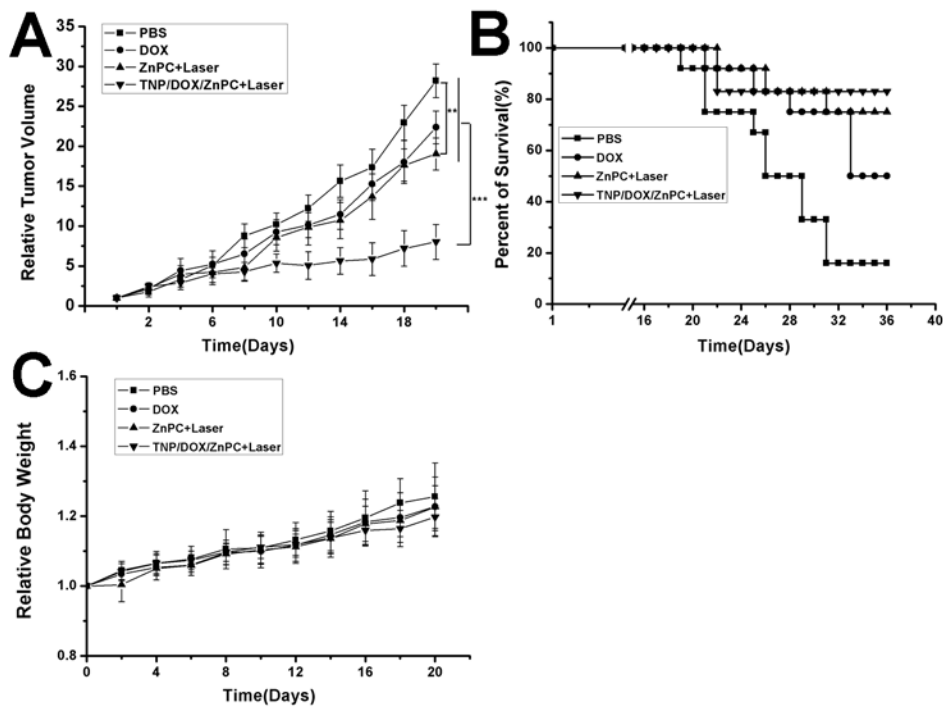

Figure S7. In vivo 5637 cells xenograft inhibition analysis. Relative tumor volume (A) and survival percentage (B) and relative body weight (C) after different treatments at day 0 with DOX or/and ZnPC was administrated at a total dose of 20 mg/kg body weight. (n=6, \*\*P<0.01, \*\*\*P<0.001.)
